# Supplementary material for: Genetic polymorphism related to monocyte-macrophage function is associated with graft-versus-host disease
Source: PubMed Central journal article supplement (PMC5688060; doi:10.1038/s41598-017-15915-3), 2017-11-15
Supplement: 41598_2017_15915_MOESM1_ESM.pdf [file 41598_2017_15915_MOESM1_ESM.pdf]

# Genetic polymorphism related to monocyte-macrophage function is associated with graft-versus-host disease

Kati Hyvärinen<sup>1</sup>, Jarmo Ritari<sup>1</sup>, Satu Koskela<sup>1</sup>, Riitta Niittyvuopio<sup>2</sup>, Anne Nihtinen<sup>2</sup>, Liisa Volin<sup>2</sup>, David Gallardo Giralt<sup>3</sup>, and Jukka Partanen<sup>1</sup>

<sup>1</sup>Finnish Red Cross Blood Service, Helsinki, Finland; <sup>2</sup>Helsinki University Hospital, Comprehensive Cancer Center, Stem Cell Transplantation Unit, Helsinki, Finland; <sup>3</sup>Department of Hematology, Institut Català d'Oncologia, Hospital Dr. Josep Trueta, Girona, Spain

## SUPPLEMENTARY DATA

Table S1. Analyzed SNPs in the Finnish cohort

Table S2. Analyzed SNPs in the Spanish cohort

Table S3. Summary of SNPs associated with GvHD in the Finnish cohort

Table S4. Summary of SNPs associated with GvHD in the Spanish cohort

Table S5. Recipient-donor frequencies in case/control association analysis

Figure S1 Legend

Figure S1. Principal component analysis of the study cohorts

References

**Table S1. Analyzed SNPs in the Finnish cohort.**

| CHR | GENE annotation | Reference study                                           | SNP*       | POSITION GRCh37 | A1 | A2 |
|-----|-----------------|-----------------------------------------------------------|------------|-----------------|----|----|
| 1   | MTHFR           | Chien et al. <sup>1</sup>                                 | rs1801131  | 11854476        | G  | T  |
| 1   | IL23R           | Chien et al. <sup>1</sup>                                 | rs11209026 | 67705958        | A  | G  |
| 1   | FCGR2A          | Kim et al. <sup>2</sup>                                   | rs1801274  | 161479745       | G  | A  |
| 1   | IL10            | Chien et al. <sup>1</sup>                                 | rs1800872  | 206946407       | T  | G  |
| 1   | IL10            | Chien et al. <sup>1</sup>                                 | rs1800871  | 206946634       | A  | G  |
| 1   | IL10            | Chien et al. <sup>1</sup>                                 | rs1800896  | 206946897       | C  | T  |
| 2   | IL1RI           | Kim et al. <sup>2</sup>                                   | rs3917225  | 102769302       | A  | G  |
| 2   | IL1RI           | Kim et al. <sup>2</sup>                                   | rs2110726  | 102794282       | A  | G  |
| 2   | IL1A            | Noori-Daloi et al. <sup>3</sup>                           | rs1800587  | 113542960       | A  | G  |
| 2   | IL1B            | Resende et al. <sup>4</sup>                               | rs1143634  | 113590390       | A  | G  |
| 2   | IL1B            | Chien et al. <sup>1</sup>                                 | rs16944    | 113594867       | A  | G  |
| 2   | CTLA4           | Harkensee et al. <sup>5</sup>                             | rs231775   | 204732714       | A  | G  |
| 2   | CTLA4           | Harkensee et al. <sup>5</sup>                             | rs231777   | 204733588       | T  | C  |
| 2   | CTLA4           | Chien et al. <sup>1</sup>                                 | rs3087243  | 204738919       | A  | G  |
| 4   | FLJ13197        | Sivula et al. <sup>6</sup>                                | rs337629   | 38635358        | A  | G  |
| 4   | FLJ13197        | Sivula et al. <sup>6</sup>                                | rs4833079  | 38654681        | C  | T  |
| 4   | IL2             | Chien et al. <sup>1</sup> , Harkensee et al. <sup>5</sup> | rs2069762  | 123377980       | C  | A  |
| 5   | IL7RA           | Shamim et al. <sup>7</sup>                                | rs1494558  | 35861068        | T  | C  |
| 5   | IL7RA           | Shamim et al. <sup>7</sup>                                | rs1494555  | 35871190        | G  | A  |
| 5   | IL12B           | Noori-Daloi et al. <sup>3</sup>                           | rs3212227  | 158742950       | G  | T  |
| 6   | -               | Petersdorf et al. <sup>8</sup>                            | rs209130   | 28867800        | T  | C  |
| 6   | MICD            | Petersdorf et al. <sup>8</sup>                            | rs2523957  | 29940260        | G  | A  |
| 6   | TNF             | Harkensee et al. <sup>5</sup> , Chien et al. <sup>1</sup> | rs1799964  | 31542308        | C  | T  |
| 6   | TNF             | Chien et al. <sup>1</sup>                                 | rs1800630  | 31542476        | A  | C  |
| 6   | TNF             | Takahashi et al. <sup>23</sup>                            | rs1800629  | 31543031        | A  | G  |
| 6   | HSPA1L          | Petersdorf et al. <sup>8</sup>                            | rs2075800  | 31777946        | T  | C  |
| 6   | ATF6B/FKBPL     | Petersdorf et al. <sup>8</sup>                            | rs3830076  | 32096244        | T  | C  |
| 6   | NOTCH4          | Petersdorf et al. <sup>8</sup>                            | rs394657   | 32187023        | G  | A  |
| 6   | HLA-DOB         | Petersdorf et al. <sup>8</sup>                            | rs2071479  | 32781112        | T  | C  |
| 6   | HLA-DPB1        | Petersdorf et al. <sup>9</sup>                            | rs9277534  | 33054807        | G  | A  |
| 6   | HLA-DPB2        | Sato-Otsubo et al. <sup>10</sup>                          | rs6937034  | 33079766        | G  | A  |
| 6   | -               | Petersdorf et al. <sup>8</sup>                            | rs107822   | 33175575        | T  | C  |

|    |             |                                                           |            |           |   |   |
|----|-------------|-----------------------------------------------------------|------------|-----------|---|---|
| 6  | VEGFA       | Chien et al. <sup>1</sup>                                 | rs833061   | 43737486  | T | C |
| 6  | IL17        | Espinoza et al. <sup>11</sup>                             | rs2275913  | 52051033  | A | G |
| 7  | IL6         | Chien et al. <sup>1</sup>                                 | rs1800795  | 22766645  | G | C |
| 10 | FAS         | Chien et al. <sup>1</sup> , Harkensee et al. <sup>5</sup> | rs1800682  | 90749963  | G | A |
| 10 | FAS         | Kim et al. <sup>2</sup>                                   | rs2234978  | 90771829  | T | C |
| 10 | FAS         | Kim et al. <sup>2</sup>                                   | rs2862833  | 90775629  | A | G |
| 10 | SUFU        | Bari et al. <sup>12</sup>                                 | rs17114803 | 104386934 | C | T |
| 10 | SUFU        | Bari et al. <sup>12</sup>                                 | rs17114808 | 104391285 | T | C |
| 12 | KRAS        | Sato-Otsubo et al. <sup>10</sup>                          | rs1137282  | 25362777  | G | A |
| 12 | IFNg        | Harkensee et al. <sup>5</sup>                             | rs2069705  | 68555011  | G | A |
| 14 | NFKBIA      | Kim et al. <sup>2</sup>                                   | rs2233409  | 35874270  | A | G |
| 16 | VKORC1      | Khaled et al. <sup>13</sup>                               | rs7294     | 31102321  | T | C |
| 16 | NOD2        | Harkensee et al. <sup>5</sup>                             | rs2111235  | 50733969  | A | G |
| 16 | NOD2        | Harkensee et al. <sup>5</sup>                             | rs6500328  | 50736656  | G | A |
| 16 | NOD2        | Jaskula et al. <sup>14</sup>                              | rs2066844  | 50745926  | T | C |
| 16 | NOD2        | Harkensee et al. <sup>5</sup>                             | rs17313265 | 50747704  | T | C |
| 17 | RANTES/CCL5 | Shin et al. <sup>15</sup>                                 | rs2280788  | 34207405  | C | G |
| 17 | -           | Shin et al. <sup>15</sup>                                 | rs2107538  | 34207780  | T | C |

CHR indicates chromosome; SNP, single nucleotide polymorphism; GRCh37, Genome Reference Consortium Human genome build 37; A1, minor allele; and A2, major allele.

\*Reference SNP number

**Table S2. Analyzed SNPs in the Spanish cohort.**

| CHR | GENE annotation | Reference study                                           | SNP*       | POSITION GRCh37 | A1 | A2 |
|-----|-----------------|-----------------------------------------------------------|------------|-----------------|----|----|
| 1   | MTHFR           | Chien et al. <sup>1</sup>                                 | rs1801131  | 11854476        | G  | T  |
| 1   | MTHFR           | Byun et al. <sup>16</sup> , Harkensee et al. <sup>5</sup> | rs1801133  | 11856378        | A  | G  |
| 1   | TNFR2           | Kim et al. <sup>2</sup>                                   | rs945439   | 12248942        | G  | A  |
| 1   | TNFR2           | Chien et al. <sup>1</sup> , Harkensee et al. <sup>5</sup> | rs1061622  | 12252955        | G  | T  |
| 1   | IL23R           | Elmaagacli et al. <sup>22</sup>                           | rs11209026 | 67705958        | A  | G  |
| 1   | DARC            | Sellami et al. <sup>17</sup>                              | rs2814778  | 159174683       | C  | T  |
| 1   | FCGR2A          | Kim et al. <sup>2</sup>                                   | rs1801274  | 161479745       | G  | A  |
| 1   | IL10            | Chien et al. <sup>1</sup>                                 | rs1800872  | 206946407       | T  | G  |
| 1   | IL10            | Chien et al. <sup>1</sup>                                 | rs1800871  | 206946634       | A  | G  |
| 1   | IL10            | Chien et al. <sup>1</sup>                                 | rs1800896  | 206946897       | C  | T  |
| 1   | -               | Sivula et al. <sup>6</sup>                                | rs2800230  | 225061429       | A  | G  |
| 1   | -               | Sivula et al. <sup>6</sup>                                | rs10737416 | 225074757       | A  | C  |
| 2   | IL1RI           | Kim et al. <sup>2</sup>                                   | rs3917225  | 102769302       | G  | A  |
| 2   | IL1RI           | Kim et al. <sup>2</sup>                                   | rs2110726  | 102794282       | A  | G  |
| 2   | IL1A            | Noori-Daloi et al. <sup>3</sup>                           | rs1800587  | 113542960       | A  | G  |
| 2   | IL1B            | Resende et al. <sup>4</sup>                               | rs1143634  | 113590390       | A  | G  |
| 2   | IL1B            | Chien et al. <sup>1</sup>                                 | rs16944    | 113594867       | A  | G  |
| 2   | CTLA4           | Harkensee et al. <sup>5</sup>                             | rs231775   | 204732714       | G  | A  |
| 2   | CTLA4           | Harkensee et al. <sup>5</sup>                             | rs231777   | 204733588       | T  | C  |
| 2   | CTLA4           | Chien et al. <sup>1</sup>                                 | rs3087243  | 204738919       | G  | A  |
| 3   | TLR9            | Xiao et al. <sup>18</sup>                                 | rs352140   | 52256697        | C  | T  |
| 3   | TLR9            | Xiao et al. <sup>18</sup>                                 | rs352139   | 52258372        | T  | C  |
| 4   | FLJ13197        | Sivula et al. <sup>6</sup>                                | rs337629   | 38635358        | A  | G  |
| 4   | FLJ13197        | Sivula et al. <sup>6</sup>                                | rs4833079  | 38654681        | C  | T  |
| 4   | IL2             | Chien et al. <sup>1</sup> , Harkensee et al. <sup>5</sup> | rs2069762  | 123377980       | C  | A  |
| 5   | IL7RA           | Shamim et al. <sup>7</sup>                                | rs1494558  | 35861068        | T  | C  |
| 5   | IL7RA           | Shamim et al. <sup>7</sup>                                | rs1494555  | 35871190        | G  | A  |
| 5   | IL12B           | Noori-Daloi et al. <sup>3</sup>                           | rs3212227  | 158742950       | G  | T  |
| 6   | -               | Petersdorf et al. <sup>8</sup>                            | rs209130   | 28867800        | C  | T  |
| 6   | MICD            | Petersdorf et al. <sup>8</sup>                            | rs2523957  | 29940260        | G  | A  |
| 6   | TNF             | Harkensee et al. <sup>5</sup> , Chien et al. <sup>1</sup> | rs1799964  | 31542308        | C  | T  |
| 6   | TNF             | Chien et al. <sup>1</sup>                                 | rs1800630  | 31542476        | A  | C  |
| 6   | TNF             | Chien et al. <sup>1</sup>                                 | rs1800629  | 31543031        | A  | G  |

|    |             |                                                           |            |           |   |   |
|----|-------------|-----------------------------------------------------------|------------|-----------|---|---|
| 6  | HSPA1L      | Petersdorf et al. <sup>8</sup>                            | rs2075800  | 31777946  | T | C |
| 6  | ATF6B/FKBPL | Petersdorf et al. <sup>8</sup>                            | rs3830076  | 32096244  | T | C |
| 6  | NOTCH4      | Petersdorf et al. <sup>8</sup>                            | rs394657   | 32187023  | G | A |
| 6  | HLA-DPB1    | Petersdorf et al. <sup>9</sup>                            | rs9277534  | 33054807  | G | A |
| 6  | HLA-DPB2    | Sato-Otsubo et al. <sup>10</sup>                          | rs6937034  | 33079766  | G | A |
| 6  | -           | Petersdorf et al. <sup>8</sup>                            | rs107822   | 33175575  | T | C |
| 6  | VEGFA       | Chien et al. <sup>1</sup>                                 | rs699947   | 43736389  | A | C |
| 6  | VEGFA       | Chien et al. <sup>1</sup>                                 | rs833061   | 43737486  | C | T |
| 6  | IL17        | Espinoza et al. <sup>11</sup>                             | rs2275913  | 52051033  | A | G |
| 7  | IL6         | Chien et al. <sup>1</sup>                                 | rs1800795  | 22766645  | C | G |
| 10 | FAS         | Chien et al. <sup>1</sup> , Harkensee et al. <sup>5</sup> | rs1800682  | 90749963  | G | A |
| 10 | FAS         | Kim et al. <sup>2</sup>                                   | rs2234978  | 90771829  | T | C |
| 10 | FAS         | Kim et al. <sup>2</sup>                                   | rs2862833  | 90775629  | G | A |
| 10 | SUFU        | Bari et al. <sup>12</sup>                                 | rs17114803 | 104386934 | C | T |
| 10 | SUFU        | Bari et al. <sup>12</sup>                                 | rs17114808 | 104391285 | T | C |
| 12 | KRAS        | Sato-Otsubo et al. <sup>10</sup>                          | rs1137282  | 25362777  | G | A |
| 12 | IFNg        | Harkensee et al. <sup>5</sup>                             | rs2069705  | 68555011  | G | A |
| 13 | BAFF        | Clark et al. <sup>19</sup>                                | rs16972217 | 108935447 | T | C |
| 13 | BAFF        | Clark et al. <sup>19</sup>                                | rs7993590  | 108935902 | T | A |
| 13 | BAFF        | Clark et al. <sup>19</sup>                                | rs12428930 | 108939705 | C | A |
| 13 | BAFF        | Clark et al. <sup>19</sup>                                | rs2893321  | 108943034 | G | A |
| 14 | NFKBIA      | Kim et al. <sup>2</sup>                                   | rs2233409  | 35874270  | A | G |
| 16 | IL4RA       | Noori-Dalooi et al. <sup>3</sup>                          | rs1801275  | 27374400  | G | A |
| 16 | VKORC1      | Khaled et al. <sup>13</sup>                               | rs7294     | 31102321  | T | C |
| 16 | NOD2        | Harkensee et al. <sup>5</sup>                             | rs2111235  | 50733969  | A | G |
| 16 | NOD2        | Harkensee et al. <sup>5</sup>                             | rs6500328  | 50736656  | G | A |
| 16 | NOD2        | Jaskula et al. <sup>14</sup>                              | rs2066844  | 50745926  | T | C |
| 16 | NOD2        | Harkensee et al. <sup>5</sup>                             | rs17313265 | 50747704  | T | C |
| 16 | NOD2        | Elmaagacli et al. <sup>20</sup>                           | rs2066847  | 50763778  | I | D |
| 19 | TGFB1       | Kim et al. <sup>2</sup>                                   | rs1800469  | 41860296  | A | G |
| 21 | IL10RB      | Lin et al. <sup>21</sup>                                  | rs2834167  | 34640788  | G | A |

Abbreviations are explained in Table S2.

\*Reference SNP number

**Table S3. Summary of SNPs associated with GvHD in the Finnish cohort.**

| Gene, location*                                             | SNP       | Reference study                  | Risk/protective <sup>†</sup> | Genotyped/Imputed | CHR | A1 | A2 | MAF   | HWE P-value | Call rate | IMPUTE2 INFO metric <sup>‡</sup> |
|-------------------------------------------------------------|-----------|----------------------------------|------------------------------|-------------------|-----|----|----|-------|-------------|-----------|----------------------------------|
| IL1B, upstream variant 2KB                                  | rs16944   | Harkensee et al. <sup>5</sup>    | Patient AA protective        | Imputed           | 2   | A  | G  | 0.383 | 0.653       | 0.98      | 0.990                            |
| IL1R1, intron                                               | rs3917225 | Kim et al. <sup>2</sup>          | Donor GG risk                | Genotyped         | 2   | A  | G  | 0.375 | 0.588       | 1         | 1                                |
| MICD,-                                                      | rs2523957 | Petersdorf et al. <sup>8</sup>   | Patient/donor mismatch risk  | Genotyped         | 6   | G  | A  | 0.318 | 0.001       | 0.99      | 1                                |
| TNF, upstream variant 2KB                                   | rs1800629 | Takahashi et al. <sup>23</sup>   | Donor A risk                 | Genotyped         | 6   | A  | G  | 0.110 | 0.664       | 1         | 1                                |
| NFKBIA, upstream variant 2KB                                | rs2233409 | Kim et al. <sup>2</sup>          | Recipient T protective       | Genotyped         | 14  | A  | G  | 0.200 | 1           | 1         | 1                                |
| NOD2, intron                                                | rs6500328 | Harkensee et al. <sup>5</sup>    | Donor GG protective          | Genotyped         | 16  | G  | A  | 0.446 | 0.864       | 1         | 1                                |
| HSPA1L, missense                                            | rs2075800 | Petersdorf et al. <sup>8</sup>   | Patient AA protective        | Genotyped         | 6   | T  | C  | 0.293 | 0.470       | 0.97      | 1                                |
| PRSS53, upstream variant 2KB/<br>VKRC1, utr variant 3 prime | rs7294    | Khaled et al. <sup>13</sup>      | Patient AA risk              | Imputed           | 16  | T  | C  | 0.407 | 0.378       | 0.99      | 0.991                            |
| KRAS, synonymous codon                                      | rs1137282 | Sato-Otsubo et al. <sup>10</sup> | Patient/donor mismatch risk  | Imputed           | 12  | G  | A  | 0.144 | 0.380       | 0.99      | 0.939                            |

SNP indicates single nucleotide polymorphism; CHR, chromosome; A1, minor allele; A2, major allele; MAF, minor allele frequency; and HWE, Hardy-Weinberg equilibrium.

\*Annotation of SNP according to National Center for Biotechnology Information dbSNP database.

<sup>†</sup> Risk/protective outcome status of the SNP in the reference study.

<sup>‡</sup>Measure of the observed statistical information associated with the allele frequency estimate.

**Table S4. Summary of SNPs associated with GvHD in the Spanish cohort.**

| Gene, location*                 | SNP        | Reference study                                   | Risk/<br>protective <sup>†</sup>                                                     | Genotyped/<br>Imputed | CHR | A1 | A2 | MAF   | HWE<br>P-<br>value | Call<br>rate | IMPUTE2<br>INFO<br>metric |
|---------------------------------|------------|---------------------------------------------------|--------------------------------------------------------------------------------------|-----------------------|-----|----|----|-------|--------------------|--------------|---------------------------|
| Not in gene                     | rs2800230  | Sivula et al. <sup>6</sup>                        | Donor CT risk                                                                        | Genotyped             | 1   | A  | G  | 0.462 | 0.050              | 1            | 1                         |
| IL1A, utr variant 5<br>prime    | rs1800587  | Noori-Dalooi et al. <sup>3</sup>                  | Donor CC risk                                                                        | Genotyped             | 2   | A  | G  | 0.290 | 0.758              | 1            | 1                         |
| IL1B, synonymous<br>codon       | rs1143634  | Resende et al. <sup>4</sup>                       | Donor T<br>protective                                                                | Genotyped             | 2   | A  | G  | 0.231 | 0.339              | 1            | 1                         |
| IL10, upstream<br>variant 2KB   | rs1800872  | Harkensee et al.;<br>Chien et al. <sup>1, 5</sup> | Donor haplotype<br>CCG risk <sup>5</sup> ;<br>Recipient T<br>protective <sup>1</sup> | Imputed               | 1   | T  | G  | 0.267 | 0.233              | 1            | 0.996                     |
| IL10, upstream<br>variant 2KB   | rs1800871  | Harkensee et al.;<br>Chien et al. <sup>1, 5</sup> | Donor haplotype<br>CCG risk <sup>5</sup> ;<br>Recipient A<br>protective <sup>1</sup> | Genotyped             | 1   | A  | G  | 0.267 | 0.233              | 1            | 1                         |
| IL10, upstream<br>variant 2KB   | rs1800896  | Harkensee et al. <sup>5</sup>                     | Donor AA<br>protective                                                               | Genotyped             | 1   | C  | T  | 0.441 | 0.302              | 1            | 1                         |
| IL10RB, missense                | rs2834167  | Lin et al. <sup>21</sup>                          | Recipient A<br>and donor G<br>protective                                             | Genotyped             | 21  | G  | A  | 0.251 | 0.500              | 1            | 1                         |
| IL23R, missense                 | rs11209026 | Elmaagacli et al. <sup>22</sup>                   | Donor A<br>protective                                                                | Genotyped             | 1   | A  | G  | 0.058 | 0.416              | 1            | 1                         |
| LOC105373109,<br>intron         | rs10737416 | Sivula et al. <sup>6</sup>                        | Patient AA<br>protective                                                             | Imputed               | 1   | A  | C  | 0.401 | 0.647              | 0.93         | 0.942                     |
| TLR9, synonymous<br>codon       | rs352140   | Xiao et al. <sup>18</sup>                         | Donor C risk                                                                         | Imputed               | 3   | C  | T  | 0.482 | 0.727              | 0.94         | 0.955                     |
| TLR9, intron                    | rs352139   | Xiao et al. <sup>18</sup>                         | Donor A risk                                                                         | Genotyped             | 3   | T  | C  | 0.458 | 0.443              | 1            | 1                         |
| FAS, downstream<br>variant 500B | rs2862833  | Kim et al. <sup>2</sup>                           | Recipient C<br>risk                                                                  | Genotyped             | 10  | G  | A  | 0.476 | 0.800              | 1            | 1                         |

Abbreviations are explained in Table S4.

\*Annotation of SNP according to National Center for Biotechnology Information dbSNP database.

<sup>†</sup> Risk/protective outcome status of the SNP in the reference study.

<sup>‡</sup>Measure of the observed statistical information associated with the allele frequency estimate.

**Table S5. Recipient-donor frequencies in case/control association analysis.**

|                   | Finnish cohort |          | Spanish cohort |          |
|-------------------|----------------|----------|----------------|----------|
|                   | Cases          | Controls | Cases          | Controls |
| <b>Recipients</b> |                |          |                |          |
| aGvHD             | 23             | 180      | 37             | 170      |
| cGvHD             | 71             | 112      | 56             | 115      |
| <b>Donors</b>     |                |          |                |          |
| aGvHD             | 28             | 188      | 41             | 183      |
| cGvHD             | 73             | 118      | 58             | 120      |

The association was determined with the 1 df chi-square allelic test case/control association analysis and expressed as odds ratios with 95% confidence interval.

aGvHD indicates acute graft-versus-host disease grade III-IV; and cGvHD, extensive chronic graft-versus-host disease.



## **Figure S1 Legend.**

**Principal component analysis -based genetic clustering of the study cohorts.** The Finnish and Spanish cohorts are indicated by blue and red colour, respectively. The analysis is based on non-imputed and LD-pruned SNPs shared by the two populations. Each data point represents an individual sample. The percent of variance explained by the two main components is indicated in parentheses.

**Figure S1. Principal component analysis of the study cohorts**

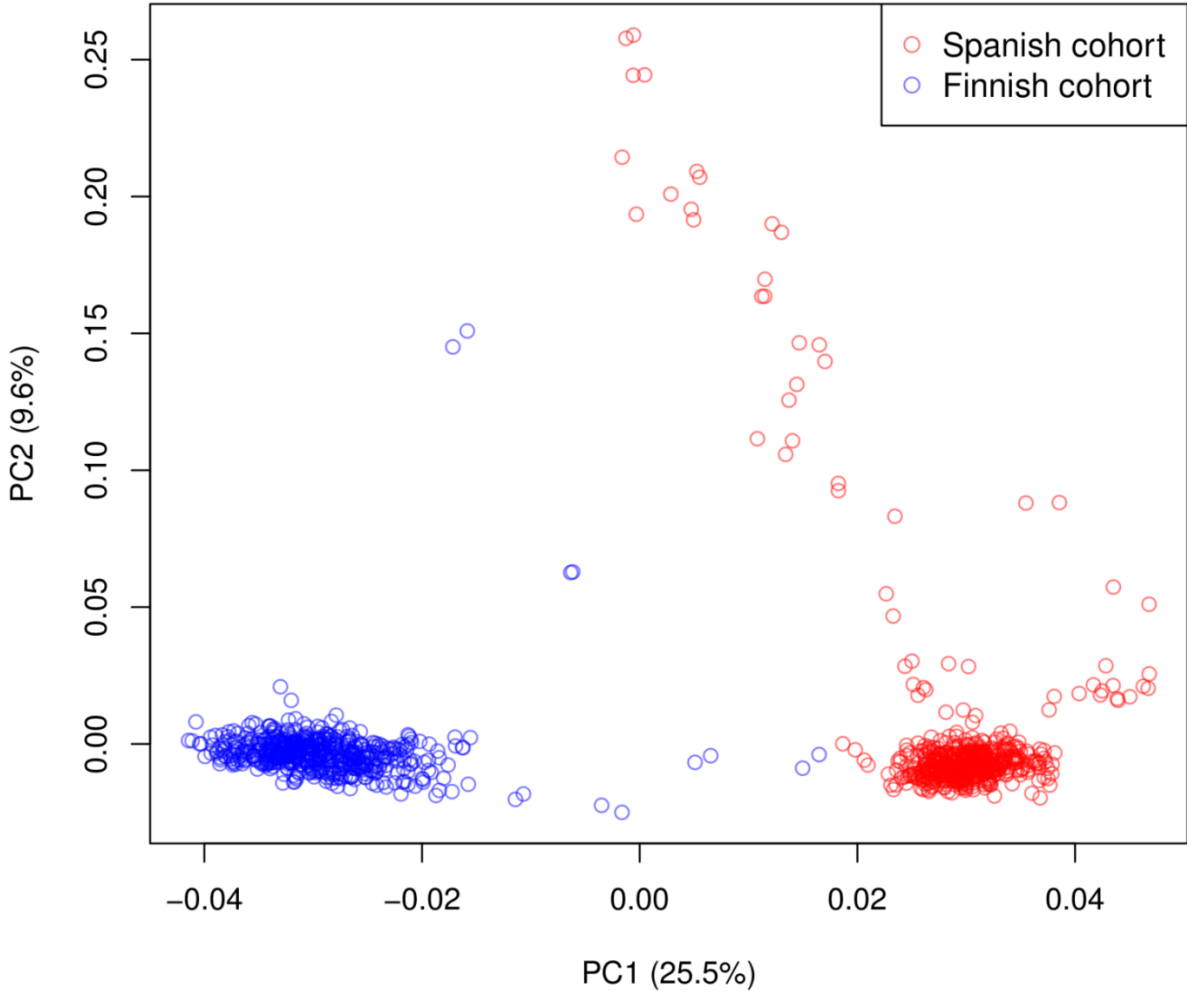

## References

1. Chien, J. W. *et al.* Evaluation of published single nucleotide polymorphisms associated with acute GVHD. *Blood* **119**, 5311-5319 (2012).
2. Kim, D. *et al.* Multiple Single-Nucleotide Polymorphism-Based Risk Model for Clinical Outcomes After Allogeneic Stem-Cell Transplantation, Especially for Acute Graft-Versus-Host Disease. *Transplantation* **94**, 1250-1257 (2012).
3. Noori-Dalooi, M. *et al.* Cytokine gene polymorphism and graft-versus-host disease: a survey in Iranian bone marrow transplanted patients. *Mol. Biol. Rep.* **40**, 4861-4867 (2013).
4. Resende, R. *et al.* Association Between IL1B (+3954) Polymorphisms and IL-1 $\beta$  Levels in Blood and Saliva, Together with Acute Graft-Versus-Host Disease. *Journal of Interferon & Cytokine Research* **33**, 392-397 (2013).
5. Harkensee, C. *et al.* Single nucleotide polymorphisms and outcome risk in unrelated mismatched hematopoietic stem cell transplantation: an exploration study. *Blood* **119**, 6365-6372 (2012).
6. Sivula, J. *et al.* Toll-like receptor gene polymorphisms confer susceptibility to graft-versus-host disease in allogenic hematopoietic stem cell transplantation. *Scand. J. Immunol.* **76**, 336-341 (2012).
7. Shamim, Z. *et al.* Polymorphism in the interleukin-7 receptor-alpha and outcome after allogeneic hematopoietic cell transplantation with matched unrelated donor. *Scand. J. Immunol.* **78**, 214-220 (2013).
8. Petersdorf, E. W. *et al.* Mapping MHC haplotype effects in unrelated donor hematopoietic cell transplantation. *Blood* **121**, 1896-1905 (2013).
9. Petersdorf, E. W. *et al.* High HLA-DP Expression and Graft-versus-Host Disease. *N. Engl. J. Med.* **373**, 599-609 (2015).
10. Sato-Otsubo, A. *et al.* Genome-wide surveillance of mismatched alleles for graft-versus-host disease in stem cell transplantation. *Blood* **126**, 2752-2763 (2015).
11. Espinoza, J. L. *et al.* A genetic variant in the IL-17 promoter is functionally associated with acute graft-versus-host disease after unrelated bone marrow transplantation. *PLoS One* **6**, e26229 (2011).
12. Bari, R. *et al.* Genome-wide single-nucleotide polymorphism analysis revealed SUFU suppression of acute graft-versus-host disease through downregulation of HLA-DR expression in recipient dendritic cells. *Scientific Reports* **5**, 11098 (2015).
13. Khaled, S. K. *et al.* Influence of Absorption, Distribution, Metabolism, and Excretion Genomic Variants on Tacrolimus/Sirolimus Blood Levels and Graft-versus-Host Disease after Allogeneic Hematopoietic Cell Transplantation. *Biology of Blood and Marrow Transplantation* **22**, 268-276 (2016).

14. Jaskula, E. *et al.* NOD2/CARD15 Single Nucleotide Polymorphism 13 (3020insC) is Associated with Risk of Sepsis and Single Nucleotide Polymorphism 8 (2104C>T) with Herpes Viruses Reactivation in Patients after Allogeneic Hematopoietic Stem Cell Transplantation. *Biology of Blood and Marrow Transplantation* **20**, 409-414 (2014).
15. Shin, D. *et al.* RANTES Polymorphisms and the Risk of Graft-versus-Host Disease in Human Leukocyte Antigen-Matched Sibling Allogeneic Hematopoietic Stem Cell Transplantation. *Acta Haematol.* **129**, 137-145 (2013).
16. Byun, J. M. *et al.* The Impact of Methylenetetrahydrofolate Reductase C677T Polymorphism on Patients Undergoing Allogeneic Hematopoietic Stem Cell Transplantation with Methotrexate Prophylaxis. *PLOS ONE* **11**, e0163998 (2016).
17. Sellami, M. H. *et al.* Evidence that erythrocyte DARC-positive phenotype can affect the GVHD occurrence after HLA-identical sibling HSCT. *Transpl. Immunol.* **25**, 148-152 (2011).
18. Xiao, H. W. *et al.* Donor TLR9 gene tagSNPs influence susceptibility to aGVHD and CMV reactivation in the allo-HSCT setting without polymorphisms in the TLR4 and NOD2 genes. *Bone Marrow Transplant.* **49**, 241-247 (2014).
19. Clark, W. B. *et al.* Genetic variation in recipient B-cell activating factor modulates phenotype of GVHD. *Blood* **118**, 1140-1144 (2011).
20. Elmaagacli, A. H. *et al.* Toll-like receptor 9, NOD2 and IL23R gene polymorphisms influenced outcome in AML patients transplanted from HLA-identical sibling donors. *Bone Marrow Transplant.* **46**, 702-708 (2011).
21. Lin, M.T. *et al.* Genetic variation in the IL-10 pathway modulates severity of acute graft-versus-host disease following hematopoietic cell transplantation: synergism between IL-10 genotype of patient and IL-10 receptor  $\beta$  genotype of donor. *Blood* **106**, 3995-4001 (2005).
22. Elmaagacli, A. H. *et al.* Relation of an interleukin-23 receptor gene polymorphism to graft-versus-host disease after hematopoietic-cell transplantation. *Bone Marrow Transplant.* **41**, 821-826 (2008).
23. Takahashi, H. *et al.* Contribution of TNF-alpha and IL-10 gene polymorphisms to graft-versus-host disease following allo-hematopoietic stem cell transplantation. *Bone Marrow Transplant.* **26**, 1317-1323 (2000).
